# Supplementary material for: Magnetic resonance radiomics features and prognosticators in different molecular subtypes of pediatric Medulloblastoma
Source: PubMed Central journal article supplement (PMC8321137; doi:10.1371/journal.pone.0255500), 2021-07-29
Supplement: pone.0255500.s002.pdf [file pone.0255500.s002.pdf]

Table S1. Employed 57 radiomic features.

| <b>Intensity based features (first order statistics)</b>                                                                                                                                            |                                                                                                                                          |                             |                                                                                          |
|-----------------------------------------------------------------------------------------------------------------------------------------------------------------------------------------------------|------------------------------------------------------------------------------------------------------------------------------------------|-----------------------------|------------------------------------------------------------------------------------------|
| Let $\mathbf{X}$ denote the three dimensional image matrix with $N$ voxels; $\bar{X}$ be the mean of $\mathbf{X}$ ; $\mathbf{P}$ be the first order histogram with $N_l$ discrete intensity levels. |                                                                                                                                          |                             |                                                                                          |
| <b>Feature</b>                                                                                                                                                                                      | <b>Formula</b>                                                                                                                           | <b>Feature</b>              | <b>Formula</b>                                                                           |
| 1. Energy                                                                                                                                                                                           | $\sum_{i=1}^N \mathbf{X}(i)^2$                                                                                                           | 2. Entropy                  | $\sum_{i=1}^{N_l} \mathbf{P}(i) \log_2 \mathbf{P}(i)$                                    |
| 3. Kurtosis                                                                                                                                                                                         | $\frac{\frac{1}{N} \sum_{i=1}^N (\mathbf{X}(i) - \bar{X})^4}{\left( \frac{1}{N} \sum_{i=1}^N (\mathbf{X}(i) - \bar{X})^2 \right)^2}$     | 4. Maximum                  | $\max(\mathbf{X})$                                                                       |
| 5. Mean                                                                                                                                                                                             | $\frac{1}{N} \sum_{i=1}^N \mathbf{X}(i)$                                                                                                 | 6. Mean absolute deviation  | $\frac{1}{N} \sum_{i=1}^N \text{abs}(\mathbf{X}(i) - \bar{X})$                           |
| 7. Median                                                                                                                                                                                           | $\text{median}(\mathbf{X})$                                                                                                              | 8. First quartile           | Value that splits off the lowest 25% of data from the highest 75%                        |
| 9. Third quatile                                                                                                                                                                                    | Value that splits off the highest 25% of data from the highest 75%                                                                       | 10. Minimum                 | $\min(\mathbf{X})$                                                                       |
| 11. Range                                                                                                                                                                                           | $\max(\mathbf{X}) - \min(\mathbf{X})$                                                                                                    | 12. Root mean square (RMS)  | $\sqrt{\frac{\sum_{i=1}^N \mathbf{X}(i)^2}{N}}$                                          |
| 13. Skewness                                                                                                                                                                                        | $\frac{\frac{1}{N} \sum_{i=1}^N (\mathbf{X}(i) - \bar{X})^3}{\left( \frac{1}{N} \sum_{i=1}^N (\mathbf{X}(i) - \bar{X})^2 \right)^{3/2}}$ | 14. Standard deviation      | $\sqrt{\frac{1}{N-1} \sum_{i=1}^N (\mathbf{X}(i) - \bar{X})^2}$                          |
| 15. Uniformity                                                                                                                                                                                      | $\sum_{i=1}^{N_l} \mathbf{P}(i)^2$                                                                                                       | 16. Variance                | $\frac{1}{N-1} \sum_{i=1}^N (\mathbf{X}(i) - \bar{X})^2$                                 |
| <b>Shape/Size based features</b>                                                                                                                                                                    |                                                                                                                                          |                             |                                                                                          |
| Let $V$ denote the tumor volume and $A$ the surface area of the volume.                                                                                                                             |                                                                                                                                          |                             |                                                                                          |
| 17. Compactness 1                                                                                                                                                                                   | $\frac{V}{\sqrt{\pi} A^{2/3}}$                                                                                                           | 18. Compactness 2           | $36\pi \frac{V^2}{A^3}$                                                                  |
| 19. Maximum 3D diameter                                                                                                                                                                             | The largest pairwise Euclidean distance between voxels on the surface of the tumor volume.                                               | 20. Spherical disproportion | $\frac{A}{4\pi R^2}$                                                                     |
| 21. Sphericity                                                                                                                                                                                      | $\frac{\pi^{1/3} (6V)^{2/3}}{A}$                                                                                                         | 22. Surface area            | $A = \sum_{i=1}^{N_s} \frac{1}{2}  a_i b_i \times a_i c_i $<br>$N_s$ is the total number |

|                             |               |            |                                                                                        |
|-----------------------------|---------------|------------|----------------------------------------------------------------------------------------|
|                             |               |            | of triangles covering the surface and $a$ , $b$ and $c$ are vertices of the triangles. |
| 23. Surface to volume ratio | $\frac{A}{V}$ | 24. Volume | The number of pixels in the tumor region multiplied by the voxel size.                 |

Table S1 (cont.). Employed 57 radiomic features.

|                                                                                                                                                                                                                                                                                                                                                                                                                                                                                                                                                                                                                                                                                                                                                                                                                                                                                                                                                                                                                                                                                                                                                                                                                                                                                                                                                                                                   |                                                                                                     |                                            |                                                                                                          |
|---------------------------------------------------------------------------------------------------------------------------------------------------------------------------------------------------------------------------------------------------------------------------------------------------------------------------------------------------------------------------------------------------------------------------------------------------------------------------------------------------------------------------------------------------------------------------------------------------------------------------------------------------------------------------------------------------------------------------------------------------------------------------------------------------------------------------------------------------------------------------------------------------------------------------------------------------------------------------------------------------------------------------------------------------------------------------------------------------------------------------------------------------------------------------------------------------------------------------------------------------------------------------------------------------------------------------------------------------------------------------------------------------|-----------------------------------------------------------------------------------------------------|--------------------------------------------|----------------------------------------------------------------------------------------------------------|
| <b>Textural features (gray-level co-occurrence matrix based features)</b>                                                                                                                                                                                                                                                                                                                                                                                                                                                                                                                                                                                                                                                                                                                                                                                                                                                                                                                                                                                                                                                                                                                                                                                                                                                                                                                         |                                                                                                     |                                            |                                                                                                          |
| <p>Let <math>\mathbf{P}(\delta, \alpha)</math> be the co-occurrence matrix for an arbitrary distance <math>\delta</math> and direction <math>\alpha</math>; <math>N_g</math> be the number of discrete intensity levels in the image; <math>p_x(i)</math> be the marginal row probabilities; <math>p_y(i)</math> be the marginal column probabilities; <math>\mu_x</math> be the mean of <math>p_x</math>; <math>\mu_y</math> be the mean of <math>p_y</math>; <math>\sigma_x</math> be the standard deviation of <math>p_x</math>; <math>\sigma_y</math> be the standard deviation of <math>p_y</math>; <math>HXY</math> be the entropy of <math>\mathbf{P}</math>; <math>HX</math> be the entropy of <math>p_x</math>; <math>HY</math> be the entropy of <math>p_y</math>;</p> <p><math>p_{x+y}(k) = \sum_{i=1}^{N_g} \sum_{j=1}^{N_g} \mathbf{P}(i, j), i + j = k, k = 2, 3, \dots, 2N_g</math>;</p> <p><math>p_{x-y}(k) = \sum_{i=1}^{N_g} \sum_{j=1}^{N_g} \mathbf{P}(i, j),  i - j  = k, k = 0, 1, \dots, N_g - 1</math>;</p> <p><math>HX = -\sum_{i=1}^{N_g} p_x(i) \log(p_x(i)), HY = -\sum_{i=1}^{N_g} p_y(i) \log(p_y(i))</math>;</p> <p><math>HXY1 = -\sum_{i=1}^{N_g} \sum_{j=1}^{N_g} \mathbf{P}(i, j) \log(p_x(i)p_y(j))</math> , <span style="float: right;"><math>HXY2 =</math></span></p> <p><math>-\sum_{i=1}^{N_g} \sum_{j=1}^{N_g} p_x(i)p_y(j) \log(p_x(i)p_y(j))</math></p> |                                                                                                     |                                            |                                                                                                          |
| 25. Autocorrelation                                                                                                                                                                                                                                                                                                                                                                                                                                                                                                                                                                                                                                                                                                                                                                                                                                                                                                                                                                                                                                                                                                                                                                                                                                                                                                                                                                               | $\sum_{i=1}^{N_g} \sum_{j=1}^{N_g} ij\mathbf{P}(i, j)$                                              | 26. Cluster Prominence                     | $\sum_{i=1}^{N_g} \sum_{j=1}^{N_g} [i + j - \mu_x - \mu_y]^4 \mathbf{P}(i, j)$                           |
| 27. Cluster Shade                                                                                                                                                                                                                                                                                                                                                                                                                                                                                                                                                                                                                                                                                                                                                                                                                                                                                                                                                                                                                                                                                                                                                                                                                                                                                                                                                                                 | $\sum_{i=1}^{N_g} \sum_{j=1}^{N_g} [i + j - \mu_x - \mu_y]^3 \mathbf{P}(i, j)$                      | 28. Cluster Tendency                       | $\sum_{i=1}^{N_g} \sum_{j=1}^{N_g} [i + j - \mu_x - \mu_y]^2 \mathbf{P}(i, j)$                           |
| 29. Contrast                                                                                                                                                                                                                                                                                                                                                                                                                                                                                                                                                                                                                                                                                                                                                                                                                                                                                                                                                                                                                                                                                                                                                                                                                                                                                                                                                                                      | $\sum_{i=1}^{N_g} \sum_{j=1}^{N_g}  i - j ^2 \mathbf{P}(i, j)$                                      | 30. Correlation                            | $\sum_{i=1}^{N_g} \sum_{j=1}^{N_g} \frac{ij\mathbf{P}(i, j) - \mu_x(i)\mu_y(j)}{\sigma_x(i)\sigma_y(j)}$ |
| 31. Difference entropy                                                                                                                                                                                                                                                                                                                                                                                                                                                                                                                                                                                                                                                                                                                                                                                                                                                                                                                                                                                                                                                                                                                                                                                                                                                                                                                                                                            | $\sum_{i=0}^{N_g-1} p_{x-y}(i) \log_2[p_{x-y}(i)]$                                                  | 32. Dissimilarity                          | $\sum_{i=1}^{N_g} \sum_{j=1}^{N_g}  i - j  \mathbf{P}(i, j)$                                             |
| 33. Energy                                                                                                                                                                                                                                                                                                                                                                                                                                                                                                                                                                                                                                                                                                                                                                                                                                                                                                                                                                                                                                                                                                                                                                                                                                                                                                                                                                                        | $\sum_{i=1}^{N_g} \sum_{j=1}^{N_g} [\mathbf{P}(i, j)]^2$                                            | 34. Entropy ( $HXY$ )                      | $-\sum_{i=1}^{N_g} \sum_{j=1}^{N_g} \mathbf{P}(i, j) \log_2(\mathbf{P}(i, j))$                           |
| 35. Homogeneity 1                                                                                                                                                                                                                                                                                                                                                                                                                                                                                                                                                                                                                                                                                                                                                                                                                                                                                                                                                                                                                                                                                                                                                                                                                                                                                                                                                                                 | $\sum_{i=1}^{N_g} \sum_{j=1}^{N_g} \frac{\mathbf{P}(i, j)}{1 +  i - j }$                            | 36. Homogeneity 2                          | $\sum_{i=1}^{N_g} \sum_{j=1}^{N_g} \frac{\mathbf{P}(i, j)}{1 +  i - j ^2}$                               |
| 37. Informational measure of correlation 1                                                                                                                                                                                                                                                                                                                                                                                                                                                                                                                                                                                                                                                                                                                                                                                                                                                                                                                                                                                                                                                                                                                                                                                                                                                                                                                                                        | $\frac{HXY - HXY1}{\max(HX, HY)}$                                                                   | 38. Informational measure of correlation 2 | $\sqrt{1 - e^{-2(HXY2 - HXY)}}$                                                                          |
| 39. Inverse Difference Moment Normalized                                                                                                                                                                                                                                                                                                                                                                                                                                                                                                                                                                                                                                                                                                                                                                                                                                                                                                                                                                                                                                                                                                                                                                                                                                                                                                                                                          | $\sum_{i=1}^{N_g} \sum_{j=1}^{N_g} \frac{\mathbf{P}(i, j)}{1 + \left(\frac{ i - j ^2}{N^2}\right)}$ | 40. Inverse Difference Normalized          | $\sum_{i=1}^{N_g} \sum_{j=1}^{N_g} \frac{\mathbf{P}(i, j)}{1 + \left(\frac{ i - j }{N}\right)}$          |

|                                                                                                                                                                                                                        |                                                                                                                                          |                                       |                                                                                                                                          |
|------------------------------------------------------------------------------------------------------------------------------------------------------------------------------------------------------------------------|------------------------------------------------------------------------------------------------------------------------------------------|---------------------------------------|------------------------------------------------------------------------------------------------------------------------------------------|
| 41. Inverse variance                                                                                                                                                                                                   | $\sum_{i=1}^{N_g} \sum_{j=1}^{N_g} \frac{\mathbf{P}(i,j)}{ i-j ^2}, i \neq j$                                                            | 42. Maximum Probability               | $\max(\mathbf{P}(i,j))$                                                                                                                  |
| 43. Sum average                                                                                                                                                                                                        | $\sum_{i=2}^{2N_g} [i \mathbf{P}_{x+y}(i)]$                                                                                              | 44. Sum entropy                       | $-\sum_{i=2}^{2N_g} \mathbf{P}_{x+y}(i) \log_2 [\mathbf{P}_{x+y}(i)]$                                                                    |
| 45. Sum variance                                                                                                                                                                                                       | $\sum_{i=2}^{2N_g} (i - SE)^2 \mathbf{P}_{x+y}(i)$                                                                                       | 46. Variance                          | $\sum_{i=1}^{N_g} \sum_{j=1}^{N_g} (i - \mu)^2 \mathbf{P}(i,j)$                                                                          |
| <b>Textural features (gray-level run-length matrix based features)</b>                                                                                                                                                 |                                                                                                                                          |                                       |                                                                                                                                          |
| Let $p(i,j \theta)$ be the $(i,j)$ th entry in the given run-length matrix $p$ for a direction $\theta$ ; $N_g$ be the number of discrete intensity levels in the image; $N_r$ be the number of different run lengths. |                                                                                                                                          |                                       |                                                                                                                                          |
| 47. Short Run Emphasis                                                                                                                                                                                                 | $\frac{\sum_{i=1}^{N_g} \sum_{j=1}^{N_r} \left[ \frac{p(i,j \theta)}{j^2} \right]}{\sum_{i=1}^{N_g} \sum_{j=1}^{N_r} p(i,j \theta)}$     | 48. Long Run Emphasis                 | $\frac{\sum_{i=1}^{N_g} \sum_{j=1}^{N_r} j^2 p(i,j \theta)}{\sum_{i=1}^{N_g} \sum_{j=1}^{N_r} p(i,j \theta)}$                            |
| 49. Gray Level Non-Uniformity                                                                                                                                                                                          | $\frac{\sum_{i=1}^{N_g} \left[ \sum_{j=1}^{N_r} p(i,j \theta) \right]^2}{\sum_{i=1}^{N_g} \sum_{j=1}^{N_r} p(i,j \theta)}$               | 50. Run Length Non-Uniformity         | $\frac{\sum_{j=1}^{N_r} \left[ \sum_{i=1}^{N_g} p(i,j \theta) \right]^2}{\sum_{i=1}^{N_g} \sum_{j=1}^{N_r} p(i,j \theta)}$               |
| 51. Run Percentage                                                                                                                                                                                                     | $\sum_{i=1}^{N_g} \sum_{j=1}^{N_r} \frac{p(i,j \theta)}{N_p}$                                                                            | 52. Low Gray Level Run Emphasis       | $\frac{\sum_{i=1}^{N_g} \sum_{j=1}^{N_r} \left[ \frac{p(i,j \theta)}{i^2} \right]}{\sum_{i=1}^{N_g} \sum_{j=1}^{N_r} p(i,j \theta)}$     |
| 53. High Gray Level Run Emphasis                                                                                                                                                                                       | $\frac{\sum_{i=1}^{N_g} \sum_{j=1}^{N_r} i^2 p(i,j \theta)}{\sum_{i=1}^{N_g} \sum_{j=1}^{N_r} p(i,j \theta)}$                            | 54. Short Run Low Gray Level Emphasis | $\frac{\sum_{i=1}^{N_g} \sum_{j=1}^{N_r} \left[ \frac{p(i,j \theta)}{i^2 j^2} \right]}{\sum_{i=1}^{N_g} \sum_{j=1}^{N_r} p(i,j \theta)}$ |
| 55. Short Run High Gray Level Emphasis                                                                                                                                                                                 | $\frac{\sum_{i=1}^{N_g} \sum_{j=1}^{N_r} \left[ \frac{p(i,j \theta) i^2}{j^2} \right]}{\sum_{i=1}^{N_g} \sum_{j=1}^{N_r} p(i,j \theta)}$ | 56. Long Run Low Gray Level Emphasis  | $\frac{\sum_{i=1}^{N_g} \sum_{j=1}^{N_r} \left[ \frac{p(i,j \theta) j^2}{i^2} \right]}{\sum_{i=1}^{N_g} \sum_{j=1}^{N_r} p(i,j \theta)}$ |
| 57. Long Run High Gray Level Emphasis                                                                                                                                                                                  | $\frac{\sum_{i=1}^{N_g} \sum_{j=1}^{N_r} i^2 j^2 p(i,j \theta)}{\sum_{i=1}^{N_g} \sum_{j=1}^{N_r} p(i,j \theta)}$                        |                                       |                                                                                                                                          |
