# Supplementary material for: Magnetic resonance radiomics features and prognosticators in different molecular subtypes of pediatric Medulloblastoma
Source: PubMed Central journal article supplement (PMC8321137; doi:10.1371/journal.pone.0255500), 2021-07-29
Supplement: pone.0255500.s004.pdf [file pone.0255500.s004.pdf]

Table S3: Accuracy of the Prediction Model Based on Different Combinations of Imaging Features Extracted from Different MR Parameters and Feature Selection Algorithms

|                               | <b>All features</b> | <b>mRMR</b> | <b>SBE</b> | <b>SFS</b> |
|-------------------------------|---------------------|-------------|------------|------------|
| <b>CET1</b>                   | 59%                 | 65%         | 62%        | 71%        |
| <b>T1W</b>                    | 51%                 | 66%         | 57%        | 66%        |
| <b>T2W</b>                    | 50%                 | 58%         | 55%        | 63%        |
| <b>ADC</b>                    | 56%                 | 61%         | 64%        | 67%        |
| <b>FLAIR</b>                  | 41%                 | 47%         | 47%        | 50%        |
| <b>CET1+T1W</b>               | 58%                 | 61%         | 58%        | 68%        |
| <b>CET1+T2W</b>               | 53%                 | 59%         | 65%        | 68%        |
| <b>CET1+FLAIR</b>             | 50%                 | 53%         | 57%        | 63%        |
| <b>CET1+ADC</b>               | 63%                 | 63%         | 66%        | 69%        |
| <b>CET1+T1W+T2W</b>           | 52%                 | 55%         | 55%        | 58%        |
| <b>CET1+T1W+T2W+ADC</b>       | 47%                 | 50%         | 50%        | 53%        |
| <b>CET1+T1W+T2W+ADC+FLAIR</b> | 46%                 | 50%         | 54%        | 54%        |
| <b>Mean accuracy</b>          | 52.2%               | 57.3%       | 57.5%      | 62.5%      |

The Highest accuracy was obtained with sequential forward selection algorithm using CET1 images. (Abbreviations: mRMR, minimum redundancy maximum relevance; SBE, sequential backward elimination; SFS, sequential forward selection.)
